# Supplementary material
Source: MDPI journal article supplement (https://www.mdpi.com/2076-3263/3/3/466)
Supplement: s1 [file s1]

## Sheet: Table S1
Table S1 - Paleocurrent data.
					Foresets		Troughs						Tectonically
Area/ Localities	Location		Formation	X-Bed	(Az)		(Az)				Bedding		Reoriented Paleocurrents			Rose
							Limb-I		Limb-II				Foreset	Trough	Vector	diagrams
	Lat	Long			Dip Dir.	Dip	Dip Dir.	Dip	Dip Dir.	Dip	Dip Dir.	Dip	Flow to	Trend	Means
GIDAR DHOR FORMATION (Tgd)
Surab				Foreset
W. Micro. St. Sec.	28 23.546	66 14.393	Tgd	Foreset	10	57					0	75	155		92.22
W. Micro. St. Sec.	28 23.546	66 14.393	Tgd	Foreset	20	77					0	75	86.6185
W. Micro. St. Sec.	28 23.546	66 14.393	Tgd	Foreset	24	85					0	75	69.517
W. Micro. St. Sec.	28 23.546	66 14.393	Tgd	Foreset	25	84					0	75	72.5252
W. Micro. St. Sec.	28 23.546	66 14.393	Tgd	Foreset	28	78					0	75	87.1697
W. Micro. St. Sec.	28 23.581	66 14.418	Tgd	Foreset	355	65					348	74	133.095		145.82
W. Micro. St. Sec.	28 23.581	66 14.418	Tgd	Foreset	353	67					348	74	134.85
W. Micro. St. Sec.	28 23.581	66 14.418	Tgd	Foreset	347	52					348	74	170.102
E. Microwave St.	28 24.953	66 18.760	Tgd	Foreset	8	64					12	62	310.38		309
E. Microwave St.	28 24.953	66 18.760	Tgd	Foreset	355	71					12	62	308.369
			Tgd
E. Microwave St.	29 24.914	67 18.572	Tgd (Congl.)	Pebble Fibric									125		112.5
E. Microwave St.	28 24.836	66 18.577	Tgd (Congl.)	Pebble Fibric							385	39	100
E. Microwave St.	28 24.708	66 18.656	Tgd	Foreset	292	42	47	42			310	55	170.31		168.5
E. Microwave St.	28 24.708	66 18.656	Tgd	Foreset	285	45	50	45			310	55	184.692
E. Microwave St.	28 24.708	66 18.656	Tgd	Foreset	283	49	54	49			310	55	196.117
E. Microwave St.	28 24.708	66 18.656	Tgd	Foreset	284	52	57	52			310	55	204.149
E. Microwave St.	28 24.708	66 18.656	Tgd	Foreset	274	47	52	47			310	55	192.973
E. Microwave St.	28 24.708	66 18.656	Tgd	Foreset	294	39	44	39			310	55	160.919
E. Microwave St.	28 24.708	66 18.656	Tgd	Foreset	294	39	44	39			310	55	160.919
E. Microwave St.	28 24.708	66 18.656	Tgd	Foreset	295	40	45	40			310	55	161.51
E. Microwave St.	28 24.708	66 18.656	Tgd	Foreset	308	35	40	35			310	55	133.348
E. Microwave St.	28 24.708	66 18.656	Tgd	Foreset	296	39	44	39			310	55	157.998
E. Microwave St.	28 24.708	66 18.656	Tgd	Foreset	305	41	46	41			310	55	143.223
E. Microwave St.	28 24.708	66 18.656	Tgd	Foreset	298	40	45	40			310	55	156.6
SW. Microwave St.	28 23.062	66 16.981	Tgd	Foreset	251	46					240	51	4.82174		59.64
SW. Microwave St.	"	"	Tgd	Foreset	248	42					240	51	29.882
SW. Microwave St.	"	"	Tgd	Foreset	232	44					240	51	97.4713
SW. Microwave St.	"	"	Tgd	Foreset	226	38					240	51	92.2061
SW. Microwave St.	"	"	Tgd	Foreset	222	64					240	51	185.384
SW. Microwave St.	"	"	Tgd	Foreset	244	55					240	51	279.834
SW. Microwave St.	28 23.062	66 16.981	Tgd	Foreset	267	52					240	51	335.841		317.98
SW. Microwave St.	"	"	Tgd	Foreset	258	57					240	51	313.109
SW. Microwave St.	"	"	Tgd	Foreset	260	62					240	51	302.486
SW. Microwave St.	"	"	Tgd	Tabular	265	57					240	51	321.167
Surab			Tgd	Trough
E. Microwave St.	28 24.953	66 18.760	Tgd	Trough			20	79	350	65	12	62		343
W. Micro. St. Sec.	28 23.724	66 14.381	Tgd	Trough			19	26	55	22	350	40		46	42
W. Micro. St. Sec.	28 23.724	66 14.381	Tgd	Trough			68	38	26	41	350	40		38
W. Micro. St. Sec.	28 23.581	66 14.418	Tgd	Trough			346	64	360	69	355	75		69	69
Johan
Johan. Splangi	29 20.618	66 55.445	Tgd	Trough			298	21	358	27	317	47		131	286.13
Johan. Splangi	29 20.618	66 55.445	Tgd	Trough			320	32	258	26	317	47		246
Johan. Splangi	29 20.618	66 55.445	Tgd	Trough			268	03	348	44	317	47		177
Johan. Splangi	29 20.618	66 55.445	Tgd	Trough			220	21	363	31	317	47		240
Quetta
Kach Village	30 26.019	67 17.676	Tgd	Trough			165	50	176	11	172	22		73	73
KACH SEQUENCE
Quetta
Zawar Knar Sec.	30 25.946	67 11.295	Kach Seq.	Foreset	135	84					115	76	184.872		197
Zawar Knar Sec.	30 25.946	67 11.295	Kach Seq.	Foreset	145	76					115	76	208.709
Kach Village	30 26.019	67 17.676	Kach Seq.	Foreset	160	38					172	22	146.062		151.36
Kach Village	30 26.019	67 17.676	Kach Seq.	Foreset	166	40					172	22	159.606
Kach Village	30 26.019	67 17.676	Kach Seq.	Foreset	155	30					172	22	121.127
Kach Village	30 26.019	67 17.676	Kach Seq.	Foreset	168	45					172	22	164.776
Kach Village	30 26.019	67 17.676	Kach Seq.	Foreset	168	43					172	22	164.406
Kach Village	30 26.019	67 17.676	Kach Seq.	Foreset	162	39					172	22	150.92
Koh-e-Khalifat
Koh-e-Khalifat	30 15.215	67 33.569	Kach Seq.	Foreset	160	70					173	55	132.213		155.35
Koh-e-Khalifat	30 15.215	67 33.569	Kach Seq.	Foreset	163	72					173	56	141.315
Koh-e-Khalifat	30 15.215	67 33.569	Kach Seq.	Foreset	144	58					173	55	81.7945
Koh-e-Khalifat	30 15.215	67 33.569	Kach Seq.	Foreset	178	60					173	55	214.516
Koh-e-Khalifat	30 15.215	67 33.569	Kach Seq.	Foreset	175	58					173	55	202.628
LOWER GHAZIJ FORMATION (Tgl)
Duki	30 07.580	68 29.108	Tgl	Tabular	63	22					5	19	114.767		101.92
Jar Manda	30 07.580	68 29.108	Tgl	Planner	90	4					5	19	172.712
Jar Manda	30 07.580	68 29.108	Tgl	Tabular	60	35					5	19	89.6045
Jar Manda	30 07.580	68 29.108	Tgl	Tabular	15	33					5	19	26.9987
Jar Manda	30 07.977	68 30.005	Tgl	Foreset	6	32					2	40	186		186.15
Jar Manda	30 07.977	68 30.005	Tgl	Foreset	15	33							195
Jar Manda	30 07.977	68 30.005	Tgl	Foreset	9	36							189
Jar Manda	30 07.977	68 30.005	Tgl	Foreset	28	40							208
Jar Manda	30 07.977	68 30.005	Tgl	Foreset	6	35							186
Jar Manda	30 07.977	68 30.005	Tgl	Foreset	5	38							185
Jar Manda	30 07.977	68 30.005	Tgl	Foreset	14	36					10	40	159.943
Jar Manda	30 07.977	68 30.005	Tgl	Foreset	5	55							354.442
Jar Manda	30 07.977	68 30.005	Tgl	Foreset	15	54							26.4007
Jar Manda	30 07.977	68 30.005	Tgl	Foreset	8	58							4.52215
Jar Manda	30 08.104	68 30.018	Tgl	Foreset	325	47					5	35	283.201		175.01
Jar Manda	30 08.104	68 30.018	Tgl	Foreset	17	26							155.979
Jar Manda	30 08.104	68 30.018	Tgl	Foreset	340	38							276.12
Jar Manda	30 08.104	68 30.018	Tgl	Foreset	348	34							262.092
Jar Manda	30 08.104	68 30.018	Tgl	Foreset	348	38							284.555
Jar Manda	30 08.104	68 30.018	Tgl	Foreset	320	44							273.807
S. Dumer Mines	30 07.541	68 30.814	Tgl	Foreset	355	37					350	50	156.957		129.03
S. Dumer Mines	30 07.541	68 30.814	Tgl	Foreset	355	36					350	50	158.112
S. Dumer Mines	30 07.541	68 30.814	Tgl	Foreset	345	39					350	50	185.916
S. Dumer Mines	30 07.541	68 30.814	Tgl	Foreset	358	44					350	50	128.396
S. Dumer Mines	30 07.541	68 30.814	Tgl	Foreset	5	23					350	50	157.667
S. Dumer Mines	30 07.541	68 30.814	Tgl	Foreset	20	53					350	50	82.3576
S. Dumer Mines	30 07.541	68 30.814	Tgl	Foreset	4	40					350	50	130.091
S. Dumer Mines	30 07.541	68 30.814	Tgl	Foreset	12	42					350	50	114.222
S. Dumer Mines	30 07.541	68 30.814	Tgl	Foreset	11	54					350	50	73.0744
S. Dumer Mines	30 07.541	68 30.814	Tgl	Foreset	10	46					350	50	101.647
Gharwas Thana	30 07.236	68 39.497	Tgl	Foreset	30	31					20	30	103.193		193.06
Gharwas Thana	30 07.236	68 39.497	Tgl	Foreset	8	21					20	30	224.537
Gharwas Thana	30 07.236	68 39.497	Tgl	Foreset	337	19					20	30	239.794
Gharwas Thana	30 07.236	68 39.497	Tgl	Foreset	26	24					20	30	178.23
Gharwas Thana	30 07.732	68 37.807	Tgl	Foreset	355	22					18	32	234.349		235.33
Gharwas Thana	30 07.732	68 37.807	Tgl	Foreset	11	27					10	32	184.809
Gharwas Thana	30 07.732	68 37.807	Tgl	Foreset	358	29					10	32	248.686
Gharwas Thana	30 07.732	68 37.807	Tgl	Foreset	356	26					10	32	232.54
Gharwas Thana	30 07.732	68 37.807	Tgl	Foreset	351	31					10	32	266.18
Gharwas Thana	30 07.730	68 38.237	Tgl	Foreset	320	35					353	30	264.287		235.06
Gharwas Thana	30 07.730	68 38.237	Tgl	Foreset	313	30					353	30	245.505
Gharwas Thana	30 07.730	68 38.237	Tgl	Foreset	300	28					353	30	235.307
Gharwas Thana	30 07.730	68 38.237	Tgl	Foreset	297	34					353	30	245.776
Gharwas Thana	30 07.730	68 38.237	Tgl	Foreset	283	26					353	30	225.198
Gharwas Thana	30 07.730	68 38.237	Tgl	Foreset	288	31					353	30	235.782
Gharwas Thana	30 07.730	68 38.237	Tgl	Foreset	253	15					353	30	199.031
Duki
Takri area	30 10.159	68 46.411	Tgl	Foreset	78	52					70	55	187.354		219.53
Takri area	30 10.159	68 46.411	Tgl	Foreset	75	50							213.071
Takri area	30 10.159	68 46.411	Tgl	Foreset	80	45							215.672
Takri area	30 10.159	68 46.411	Tgl	Foreset	69	52							264.705
Kingri
Kingri sec. area	30 26.20	69 46.47	Tgl	Foreset	142	58					120	55	206.952		251.58
Kingri sec. area			Tgl	Foreset	118	33					120	55	302.903
Kingri sec. area			Tgl	Foreset	157	42					120	55	246.889
Duki
Jar Manda	30 07.580	68 29.108	Tgl	Trough			30	25	348	31	5	19		25	25
Jar Manda	30 08.104	68 30.018	Tgl	Trough .			310	38	20	34	0	35		173	341.5
Jar Manda	30 08.104	68 30.018	Tgl	Trough			25	56	320	34	0	35		330
MIDDLE GHAZIJ FORMATION (Tgm)
Kalat, Surab
E. Microwave St.	28 25.299	66 19.617	Tgm	Foreset	30	42					6	42	104.976		128.38
E. Microwave St.	28 25.299	66 19.617	Tgm	Foreset	32	39					6	42	115.864
E. Microwave St.	28 25.299	66 19.617	Tgm	Foreset	43	28					6	42	143.853
E. Microwave St.	28 25.299	66 19.617	Tgm	Foreset	50	36					6	42	125.085
E. Microwave St.	28 25.299	66 19.617	Tgm	Foreset	22	33					6	42	144.904
Phad Maran
Shaikri	29 12.950	66 49.314	Tgm	Foreset	235	37					275	38	166.638		151.65
Shaikri	"	"	Tgm	Foreset	267	32					275	38	129.182
Shaikri	"	"	Tgm	Foreset	235	40					275	38	173.561
Shaikri	"	"	Tgm	Foreset	260	38					275	38	179.077
Shaikri	"	"	Tgm	Foreset	274	37					275	38	125.936
Shaikri	"	"	Tgm	Tabular	135	-					275	38	135
Horbi Hills (Sec.)	29 01.502	66 45.137	Tgm	Foreset	345						285	25	83.6467		83.65
Sor Range
Shin Ghawazh	30 10.469	67 11.675	Tgm	Foreset	210	34					218	30	167.888		159.89
Shin Ghawazh	(ref. SRPM0019 sample)		Tgm	Foreset	208	35					223	32	146.544
Shin Ghawazh	30 10.469	67 11.675	Tgm	Foreset	200	59					216	51	152.593
Shin Ghawazh	30 10.469	67 11.675	Tgm	Foreset	192	58					216	51	138.383
Shin Ghawazh	30 10.469	67 11.675	Tgm	Foreset	212	60					216	51	194.72
Less Daghari
Plant Foss. Loc.	30 03.335	67 15.343	Tgm	Foreset	259	35					257	45	70.4334		108.65
Plant Foss. Loc.	30 03.335	67 15.343	Tgm	Foreset	256	43					257	45	95.7952
Plant Foss. Loc.	30 03.335	67 15.343	Tgm	Foreset	235	39					257	45	136.85
Plant Foss. Loc.	30 03.335	67 15.343	Tgm	Foreset	250	38					257	45	107.951
Plant Foss. Loc.	30 03.335	67 15.343	Tgm	Foreset	245	40					257	45	131.003
Plant Foss. Loc.	30 03.335	67 15.343	Tgm	Foreset	288	44					257	45
Mach
National Mine	29 54.546	67 18.175	Tgm	Foreset	95	33					74	31	162.858		167.52
National Mine	29 54.546	67 18.175	Tgm	Foreset	82	26					74	31	220.106
National Mine	29 54.546	67 18.175	Tgm	Foreset	96	32					74	31	168.5
National Mine	29 54.546	67 18.175	Tgm	Foreset	98	30					74	31	179.003
National Mine	29 54.546	67 18.175	Tgm	Foreset	94	35					74	31	152.446
National Mine	29 54.546	67 18.175	Tgm	Foreset	92	29					74	31	184.24
National Mine	29 54.546	67 18.175	Tgm	Foreset	90	37					74	31	136.994
National Mine	29 54.546	67 18.175	Tgm	Foreset	110	28					74	31	189.088
National Mine	29 54.546	67 18.175	Tgm	Foreset	88	31					74	31	170.008
National Mine	29 54.546	67 18.175	Tgm	Foreset	85	35					74	31	134.977
National Mine	29 54.546	67 18.175	Tgm	Ripple		-					74	31	150
National Mine	29 55.586	67 17.739	Tgm	Foreset	85	28					60	17	113.141		109.45
National Mine	29 55.586	67 17.739	Tgm	Foreset	81	27					60	17	108.328
National Mine	29 55.586	67 17.739	Tgm	Foreset	78	38					60	17	89.9978
National Mine	29 55.586	67 17.739	Tgm	Foreset	95	40					60	17	112.828
National Mine	29 55.586	67 17.739	Tgm	Foreset	100	36					60	17	122.813
Khost
S. Railway St.	30 13.103	67 34.718	Tgm	Foreset	246	17					250	15	83.0749		131.18
S. Railway St.	30 13.103	67 34.718	Tgm	Foreset	223	20					250	15	135.898
S. Railway St.	30 13.103	67 34.718	Tgm	Foreset	205	25					250	15	148.2
S. Railway St.	30 13.103	67 34.718	Tgm	Foreset	216	24					250	15	152.592
S. Railway St.	30 13.003	67 34.634	Tgm	Foreset	200	52					202	59	34.6915		20.65
S. Railway St.	30 13.003	67 34.634	Tgm	Foreset	205	44					202	59	14.0191
S. Railway St.	30 13.003	67 34.634	Tgm	Foreset	203	42					202	59	19.7131
S. Railway St.	30 13.003	67 34.634	Tgm	Foreset	215	50					202	59	336.023
S. Railway St.	30 13.003	67 34.634	Tgm	Tabular?	195	69					202	59	168.217
S. Railway St.	30 13.003	67 34.634	Tgm	Tabular?	190	40					202	59	43.8788
S. Railway St.	30 13.003	67 34.634	Tgm	Tabular?	205	53					202	59	0.311251
S. Railway St.	30 12.974	67 34.605	Tgm	Foreset	215	52					225	38	194.52		170.65
S. Railway St.	30 12.974	67 34.605	Tgm	Foreset	210	35					225	38	110.473
S. Railway St.	30 12.974	67 34.605	Tgm	Foreset	208	73					225	38	197.654
S. Railway St.	30 12.926	67 34.582	Tgm	Foreset	225	54					210	53	299.764		211.91
S. Railway St.	30 12.926	67 34.582	Tgm	Foreset	225	65					210	53	261.092
S. Railway St.	30 12.926	67 34.582	Tgm	Foreset	230	55					210	53	298.943
S. Railway St.	30 12.926	67 34.582	Tgm	Foreset	207	69					210	53	199.921
S. Railway St.	30 12.926	67 34.582	Tgm	Foreset	188	61					210	53	137.108
S. Railway St.	30 12.926	67 34.582	Tgm	Foreset	182	64					210	53	136.812
S. Railway St.	30 12.926	67 34.582	Tgm	Foreset	194	68					210	53	162.866
S. Railway St.	30 12.926	67 34.582	Tgm	Foreset	202	53					210	53	117.59
S. Railway St.	30 12.926	67 34.582	Tgm	Foreset	222	70					210	53	244.905
S. Railway St.	30 12.926	67 34.582	Tgm	Foreset	220	65					210	53	248.251
S. Railway St.	30 12.906	67 34.585	Tgm	Foreset	180	52					194	54	89.6816		102.41
S. Railway St.	30 12.906	67 34.585	Tgm	Foreset	175	45					194	54	66.1211
S. Railway St.	30 12.906	67 34.585	Tgm	Foreset	185	54					194	54	101.351
S. Railway St.	30 12.906	67 34.585	Tgm	Foreset	183	39					193	55	34.2426
S. Railway St.	30 12.906	67 34.585	Tgm	Foreset	188	63					194	54	162.764
S. Railway St.	30 12.906	67 34.585	Tgm	Foreset	192	60					194	54	177.828
S. Railway St.	30 12.906	67 34.585	Tgm	Foreset	193	43					194	54	17.5683
S. Railway St.	30 12.906	67 34.585	Tgm	Foreset	192	56					194	54	154.099
S. Railway St.	30 12.906	67 34.585	Tgm	Foreset	193	53					194	54	52.4979
S. Railway St.	30 12.906	67 34.585	Tgm	Foreset	172	55					194	54	100.716
SE. Railway St.	30 12.287	67 35.905	Tgm	Foreset	225	62					190	62	288.42
SE. Railway St.	30 12.287	67 35.905	Tgm	Foreset	195	66					190	62	239.449
SE. Railway St.	30 12.263	67 35.912	Tgm	Foreset	156	48					185	60	59.7631		48.27
SE. Railway St.	30 12.263	67 35.912	Tgm	Foreset	175	43					185	60	26.7029
SE. Railway St.	30 12.263	67 35.912	Tgm	Foreset	155	50					185	60	64.5727
SE. Railway St.	30 12.263	67 35.912	Tgm	Foreset	167	52					185	60	61.947
SE. Railway St.	30 12.263	67 35.912	Tgm	Foreset	170	40					185	60	30.2359
SE. Railway St.	30 12.263	67 35.912	Tgm	Foreset	178	42					185	60	19.6696
SE. Railway St.	30 12.263	67 35.912	Tgm	Foreset	165	39					185	60	34.7008
SE. Railway St.	30 12.263	67 35.912	Tgm	Foreset	170	56					185	60	73.6483
SE. Railway St.	30 12.263	67 35.912	Tgm	Foreset	178	46					185	60	24.7176
SE. Railway St.	30 12.263	67 35.912	Tgm	Foreset	150	60					185	60	86.0411
Shahrig
PMDC Mines	30 07.964	67 45.920	Tgm	Foreset	227	58					215	73	1.28578		15.61
PMDC Mines	30 07.964	67 45.920	Tgm	Foreset	215	47					215	73	35
PMDC Mines	30 07.964	67 45.920	Tgm	Foreset	205	51					215	73	54.6443
PMDC Mines	30 07.964	67 45.920	Tgm	Foreset	240	64					215	73	330.485
PMDC Mines	30 07.920	67 45.908	Tgm	Foreset	209	87					208	78	214.358		179.73
PMDC Mines	30 07.920	67 45.908	Tgm	Foreset	202	82					208	78	151.545
PMDC Mines	30 07.920	67 45.908	Tgm	Foreset	210	86					208	78	222.057
PMDC Mines	30 07.920	67 45.908	Tgm	Foreset	202	81					208	78	144.383
PMDC Mines	30 07.920	67 45.908	Tgm	Foreset	204	83					208	78	169.375
PMDC Mines	30 08.846	67 45.146	Tgm	Foreset	70	48					60	54	190.743		170.54
PMDC Mines	30 08.846	67 45.146	Tgm	Foreset	75	47					60	54	185.8
PMDC Mines	30 08.846	67 45.146	Tgm	Foreset	70	56					60	54	139.187
PMDC Mines	30 08.846	67 45.146	Tgm	Foreset	76	47					60	54	184.495
PMDC Mines	30 08.846	67 45.146	Tgm	Foreset	70	57					60	54	132.884
PMDC Mines	30 08.846	67 45.146	Tgm	Foreset	84	46					60	54	180.989
PMDC Mines	30 08.846	67 45.146	Tgm	Foreset	84	47					60	54	178.13
PMDC Mines	30 08.846	67 45.146	Tgm	Foreset	70	63					60	54	106.18
PMDC Mines	30 08.846	67 45.146	Tgm	Foreset	60	37					60	54	240
PMDC Mines	30 08.846	67 45.146	Tgm	Foreset	81	51					60	54	166.534
PMDC Mines	30 10.098	67 42.932	Tgm	Foreset	208	72					201	69	267.75		147.51
PMDC Mines	30 10.098	67 42.932	Tgm	Foreset	213	4					201	69	20.0838
PMDC Mines	30 10.098	67 42.932	Tgm	Foreset	188	76					201	69	138.362
PMDC Mines	30 10.098	67 42.932	Tgm	Foreset	196	89					201	69	186.651
PMDC Mines	30 10.098	67 42.932	Tgm	Foreset	185	74					201	69	126.566
PMDC Mines	30 10.098	67 42.932	Tgm	Foreset	195	88					201	69	183.109
PMDC Mines	30 10.098	67 42.932	Tgm	Foreset	186	86					201	69	158.34
PMDC Mines	30 10.098	67 42.932	Tgm	Foreset	185	87					201	69	157.997
PMDC Mines	30 10.098	67 42.932	Tgm	Foreset	196	77					201	69	169.364
PMDC Mines	30 10.098	67 42.932	Tgm	Foreset	185	84					201	69	152.79
PMDC Mines	30 10.098	67 42.932	Tgm	Foreset	183	75					201	69	127.353
PMDC Mines	30 10.098	67 42.932	Tgm	Foreset	186	85					201	69	156.62
PMDC Mines	30 10.098	67 42.932	Tgm	Foreset	182	72					201	69	117.224
PMDC Mines	30 10.098	67 42.932	Tgm	Foreset	191	72					201	69	126.937
PMDC Mines	30 10.098	67 42.932	Tgm	Foreset	182	71					201	69	114.057
Duki
Jar Manda	30 08.199	68 30.352	Tgm	Foreset	30	46					5	35	70.9609		74.96
Jar Manda	30 08.199	68 30.352	Tgm	Foreset	30	32							117.553
Jar Manda	30 08.199	68 30.352	Tgm	Foreset ?	33	45							77.315
Jar Manda	30 08.199	68 30.352	Tgm	Foreset ?	32	43							80.811
Jar Manda	30 08.199	68 30.352	Tgm	Foreset ?	10	44							26.4277
Jar Manda	30 08.416	68 30.396	Tgm	Foreset	42	28					5	35	130.2		89.93
Jar Manda	30 08.416	68 30.396	Tgm	Foreset	30	35							105.293
Jar Manda	30 08.416	68 30.396	Tgm	Foreset	28	48							63.6984
Jar Manda	30 08.416	68 30.396	Tgm	Foreset	25	47							60.5207
Jar Manda	30 08.416	68 30.396	Tgm	Foreset	27	37							95.2534
Jar Manda	30 08.416	68 30.396	Tgm	Foreset	3	35							274.181
Jar Manda	30 08.646	68 30.493	Tgm	Foreset	15	35					2	40	129.335		165.98
Jar Manda	30 08.646	68 30.493	Tgm	Foreset	15	29					2	40	153.436
Jar Manda	30 08.646	68 30.493	Tgm	Foreset	6	35					2	40	157.606
Jar Manda	30 08.646	68 30.493	Tgm	Foreset	25	40					2	40	100.858
Jar Manda	30 08.646	68 30.493	Tgm	Foreset	355	30					2	40	201.046
Jar Manda	30 08.646	68 30.493	Tgm	Foreset	354	22					2	40	191.492
Jar Manda	30 08.646	68 30.493	Tgm	Foreset	308	27					2	40	226.92
Jar Manda	30 08.736	68 30.542	Tgm	Foreset	340	36					2	50	221.257		239.94
Jar Manda	30 08.736	68 30.542	Tgm	Foreset	358	59					2	50	340.917
Jar Manda	30 08.736	68 30.542	Tgm	Foreset	345	43					2	50	236.73
Jar Manda	30 08.736	68 30.542	Tgm	Foreset	355	45					2	50	225.584
Jar Manda	30 08.736	68 30.542	Tgm	Foreset	346	42					2	50	231.805
Jar Manda	30 08.736	68 30.542	Tgm	Foreset	358	49					2	50	252.508
Jar Manda	30 08.736	68 30.542	Tgm	Foreset	356	48					2	50	246.221
Jar Manda	30 08.736	68 30.542	Tgm	Foreset	355	40					2	50	205.906
Jar Manda	30 08.736	68 30.542	Tgm	Foreset	352	46					2	50	240.422		234.04
Jar Manda	30 08.736	68 30.542	Tgm	Foreset	347	50					2	50	267.163
Jar Manda	30 08.736	68 30.542	Tgm	Foreset	338	42					2	50	239.057
Jar Manda	30 08.736	68 30.542	Tgm	Foreset	349	54					2	50	289.227
Jar Manda	30 08.736	68 30.542	Tgm	Foreset	348	53					2	50	282.866
Jar Manda	30 08.736	68 30.542	Tgm	Foreset	347	53					2	50	281.568
Jar Manda	30 08.736	68 30.542	Tgm	Foreset	345	41					2	50	229.647
Jar Manda	30 08.736	68 30.542	Tgm	Foreset	350	39					2	50	215.239
Jar Manda	30 08.736	68 30.542	Tgm	Foreset	332	23					2	50	203.833
Jar Manda	30 08.736	68 30.542	Tgm	Foreset	20	46					2	50	114.569
Jar Manda	30 08.736	68 30.542	Tgm	Foreset	10	48					2	50	112.926
Jar Manda	30 08.736	68 30.542	Tgm	Foreset	23	56					2	50	78.9007
Jar Manda	30 08.858	68 30.597	Tgm	Foreset	22	31					15	46	181.502		161.83
Jar Manda	30 08.858	68 30.597	Tgm	Foreset	30	38					15	46	148.975
Jar Manda	30 08.858	68 30.597	Tgm	Foreset	40	25					15	46	170.162
Jar Manda	30 08.858	68 30.597	Tgm	Foreset	50	39					15	46	134.102
Jar Manda	30 08.858	68 30.597	Tgm	Foreset	30	25					15	46	178.462
Jar Manda	30 08.858	68 30.597	Tgm	Foreset	35	27					15	46	170.743
Jar Manda	30 08.858	68 30.597	Tgm	Foreset	27	25					15	46	181.457
Jar Manda	30 08.858	68 30.597	Tgm	Foreset	58	27					15	46	157.96
Jar Manda	30 08.858	68 30.597	Tgm	Foreset	42	21					15	46	175.113
Jar Manda	30 08.858	68 30.597	Tgm	Foreset	47	37					15	46	139.595
Jar Manda	30 08.858	68 30.597	Tgm	Foreset	48	30					15	46	155.612
Jar Manda	30 08.858	68 30.597	Tgm	Foreset	49	26					15	46	163.117
Jar Manda	30 08.858	68 30.597	Tgm	Foreset	62	33					15	46	145.918
Gharwas Thana	30 07.947	68 38.665	Tgm	Foreset	240	11					0	24	198.764		243.82
Gharwas Thana	30 07.947	68 38.665	Tgm	Foreset	291	23					0	24	235.953
Gharwas Thana	30 07.947	68 38.665	Tgm	Foreset	290	25					0	24	239.217
Gharwas Thana	30 07.947	68 38.665	Tgm	Foreset	331	26					0	24	265.879
Gharwas Thana	30 07.947	68 38.665	Tgm	Foreset	325	31					0	24	277.097
Gharwas Thana	30 08.312	68 39.482	Tgm	Foreset	241	16					20	17	220.644		245.07
Gharwas Thana	30 08.312	68 39.482	Tgm	Foreset	275	18					20	17	240.094
Gharwas Thana	30 08.312	68 39.482	Tgm	Foreset	280	28					20	17	253.984
Gharwas Thana	30 08.312	68 39.482	Tgm	Foreset	292	28					20	17	262.67
Gharwas Thana	30 08.312	68 39.482	Tgm	Foreset	287	20					20	17	249.486
Gharwas Thana	30 08.312	68 39.482	Tgm	Foreset	5	11					20	17	224.034
Gharwas Thana	30 08.312	68 39.482	Tgm	Foreset	325	17					20	17	263.535
Sadozai Killi
E. Sadozai Killi	30 10.156	68 54.329	Tgm	Foreset	215	9					2	28	190.363		188.92
E. Sadozai Killi	30 10.156	68 54.329	Tgm	Foreset	300	11					2	28	205.813
E. Sadozai Killi	30 10.156	68 54.329	Tgm	Foreset	32	12					2	28	162.901
E. Sadozai Killi	30 10.156	68 54.329	Tgm	Tabular	196	15					2	28	187.298
E. Sadozai Killi	30 10.156	68 54.329	Tgm	Tabular	345	14					2	28	197.722
E. Sadozai Killi	30 10.156	68 54.329	Tgm	Foreset	339	36					8	35	269.435		233.04
E. Sadozai Killi	30 10.156	68 54.329	Tgm	Foreset	9	30					8	35	182.287
E. Sadozai Killi	30 10.156	68 54.329	Tgm	Foreset	336	27					8	35	238.876
E. Sadozai Killi	30 10.156	68 54.329	Tgm	Foreset	325	26					8	35	237.771
E. Sadozai Killi	30 10.156	68 54.329	Tgm	Foreset	305	22					28	25	254.693		221.28
E. Sadozai Killi	30 10.156	68 54.329	Tgm	Foreset	353	33					28	25	307.076
E. Sadozai Killi	30 10.156	68 54.329	Tgm	Foreset	77	6					28	25	195.578
E. Sadozai Killi	30 10.156	68 54.329	Tgm	Foreset	25	18					28	25	215.536
E. Sadozai Killi	30 10.156	68 54.329	Tgm	Foreset	18	18					28	25	231.048
E. Sadozai Killi	30 10.156	68 54.329	Tgm	Foreset	20	15					28	25	219.571
E. Sadozai Killi	30 10.156	68 54.329	Tgm	Foreset	45	17					28	25	178.445
E. Sadozai Killi	30 10.156	68 54.329	Tgm	Foreset	45	10					28	25	197.182
E. Sadozai Killi	30 10.156	68 54.329	Tgm	Foreset	348	23					28	25	272.882
E. Sadozai Killi	30 10.156	68 54.329	Tgm	Foreset	72	18					28	25	161.042
Kingri
Kingri sec.	30 25.881	69 46.736	Tgm	Foreset	95	83					104	55	85.4409		116.52
Kingri sec.	(Level 594m)		Tgm	Foreset	105	71					104	55	107.427
Kingri sec.			Tgm	Foreset	120	66					104	55	159.896
Kingri sec.	Level 741m		Tgm	Foreset	128	86					100	68	160.471		168.3
Kingri sec.			Tgm	Foreset	121	72					100	68	182.298
Kingri sec.	"	"	Tgm	Foreset	113	75					100	68	162.607
Kingri sec.	"	"	Tgm	Foreset	116	61					110	55	151.931		132.55
Kingri sec.	"	"	Tgm	Foreset	125	63					110	55	172.166
Kingri sec.	"	"	Tgm	Foreset	100	62					110	55	56.6742
Kingri sec.	Level 1051m	(KPM98011)	Tgm	Foreset	234	5					95	35	269.775		270
Kingri sec.			Tgm	Foreset	125	35					115	44	263.527		255.45
Kingri sec.			Tgm	Foreset	155	44					115	44	219.672
Kingri sec.			Tgm	Foreset	128	21					115	44	283.531
Kingri sec.			Tgm	Foreset	124	83					102	64	153.677		152.36
Kingri sec.			Tgm	Foreset	111	78					102	64	134.887
Kingri sec.			Tgm	Foreset	115	70					102	64	168.033
Kalat
E. Microwave St.	28 25.299	66 19.617	Tgm	Trough			318	35	38	28	6	42		187	187
Surab
E. Microwave St.	28 25.299	66 19.617	Tgm	Ripple									135		135
Horbi Hills	29 01.502	66 45.137	Tgm	Trough			314	49	277	47	285	50		108	293.5
Horbi Hills	"	"	Tgm	Trough			310	46	284	40	285	50		96
Horbi Hills	"	"	Tgm	Trough			250	44	325	29	285	50		125
Horbi Hills	"	"	Tgm	Trough			255	41	315	36	305	40		116
Horbi Hills	"	"	Tgm	Trough			312	42	280	54	310	50		147
Horbi Hills	"	"	Tgm	Trough			320	34	285	42	310	50		144
Horbi Hills	"	"	Tgm	Trough			312	47	290	32	310	50		76
Horbi Hills	"	"	Tgm	Trough			308	44	288	37	310	50		93
Horbi Hills	"	"	Tgm	Trough			250	37	292	43	270	30		259
Horbi Hills	29 01.732	66 44.973	Tgm	Trough			8	26	290	34	270	25		332
Phad Maran
Kishan - Morgan	29 13.335	66 48.603	Tgm	Trough			87	43	137	35	90	38		121	287.48
Kishan - Morgan	"	"	Tgm	Trough			84	40	140	44	90	38		101
Kishan - Morgan	"	"	Tgm	Trough			95	81	192	74	90	50		143
Kishan - Morgan	"	"	Tgm	Trough			85	62	205	66	90	50		86
Kishan - Morgan	"	"	Tgm	Trough			127	60	200	62	90	50		111
Kishan - Morgan	"	"	Tgm	Trough			80	67	215	57	90	50		111
Kishan - Morgan	"	"	Tgm	Trough			100	40	205	48	90	50		245
Kishan - Morgan	"	"	Tgm	Trough			95	74	222	62	90	50		120
Less Daghari
Plant Foss. Loc.	30 03.356	67 15.341	Tgm	Trough			284	68	249	32	252	50		7	12.26
Plant Foss. Loc.	30 03.356	67 15.341	Tgm	Trough			259	55	253	37	252	50		3
Plant Foss. Loc.	30 03.356	67 15.341	Tgm	Trough			259	25	207	34	252	50		145
Plant Foss. Loc.	30 03.356	67 15.341	Tgm	Trough			290	52	227	24	252	50		10
Plant Foss. Loc.	30 03.356	67 15.341	Tgm	Trough			287	39	254	23	252	50		16
Plant Foss. Loc.	30 03.356	67 15.341	Tgm	Trough			281	66	216	51	252	50		203
Plant Foss. Loc.	30 03.356	67 15.341	Tgm	Trough			278	69	224	54	252	50		205
Plant Foss. Loc.	30 03.356	67 15.341	Tgm	Trough			260	50	218	29	252	50		185
Plant Foss. Loc.	30 03.356	67 15.341	Tgm	Trough			256	52	236	31	252	50		187
Plant Foss. Loc.	30 03.356	67 15.341	Tgm	Trough			280	71	217	47	252	50		202
Pir Ismail Ziart (PIZ)
Ibrahim Mari Mines	30 03.168	67 25.310	Tgm	Trough			-	-	-	-	-	-	-	197	187.53
Ibrahim Mari Mines	30 03.168	67 25.310	Tgm	Trough			-	-	-	-	-	-	-	298
Ibrahim Mari Mines	30 03.168	67 25.310	Tgm	Trough			-	-	-	-	-	-	-	17
Ibrahim Mari Mines	30 03.168	67 25.310	Tgm	Trough			-	-	-	-	-	-	-	155
Ibrahim Mari Mines	30 03.168	67 25.310	Tgu	Trough			-	-	-	-	-	-	-	164
Mach
National Mine	29 55.586	67 17.739	Tgm	Trough			76	32	92	34	65	35		248	68.5
National Mine	29 55.586	67 17.739	Tgm	Trough			66	35	92	37	65	35		69
Shahrig
PMDC Mines	30 07.964	67 45.920	Tgm	Trough			230	59	255	38	215	73		276	276
PMDC Mines	30 07.644	67 45.827	Tgm	Trough			210	81	217	89	211	82		162	162
Duki
Gharwas Thana	30 07.947	68 38.665	Tgm	Trough			250	10	299	19	0	19		243	243
Gharwas Thana	30 08.312	68 39.482	Tgm	Trough			248	29	308	32	20	17		281	247.5
Gharwas Thana	30 08.312	68 39.482		Trough .			140	24	144	20	20	17		214
Kingri sec.	30 25.864	69 47.052	Tgm	Ripple	147	34					80	60	219.782		215.02
Kingri sec.	Level 957m.		Tgm	Ripple	148	33					80	60	221.031
Kingri sec.			Tgm	Ripple	122	69					104	71	203.789
Kingri sec.			Tgm	Trough										120	120
UPPER GHAZIJ FORMATION (Tgu)
Surab
Microwave St.	28 25.065	66 16.968	Tgu	Foreset	14	34					8	37	141.144		123.71
Microwave St.			Tgu	Foreset	20	32					8	37	139.186
Microwave St.	"	"	Tgu	Foreset	8	36					8	37	188
Microwave St.	"	"	Tgu	Foreset	6	38					8	37	316.601
Microwave St.	"	"	Tgu	Foreset	19	21					8	37	174.318
Microwave St.	"	"	Tgu	Foreset	20	19					8	37	175.861
Microwave St.	"	"	Tgu	Foreset	44	50					8	37	84.4989
Microwave St.	"		Tgu	Foreset	25	44					8	37	72.3267
Microwave St.	"	"	Tgu	Foreset	46	45					8	37	95.4407
Microwave St.	"	"	Tgu	Foreset	25	48					8	37	60.8075
Microwave St.	28 25.244	66 16.664	Tgu	Foreset	8	52					6	55	158.403		107.43
Microwave St.	"		Tgu	Foreset	20	50					6	55	124.401
Microwave St.	"	"	Tgu	Foreset	10	50					6	55	154.798
Microwave St.	"	"	Tgu	Foreset	18	54					6	55	105.316
Microwave St.	"	"	Tgu	Foreset	22	57					6	55	91.9754
Microwave St.	"	"	Tgu	Foreset	22	52					6	55	113.826
Microwave St.	"	"	Tgu	Foreset	8	56					6	55	65.324
Microwave St.	"	"	Tgu	Foreset	3	61					6	55	342.212
Microwave St.	"	"	Tgu	Foreset	22	55					6	55	100.609
Sor Range
Shin Ghawazh	30 10.367	67 11.748	Tgu	Tabular	192	43					205	54	62.3418		257.2
Shin Ghawazh	(between SRPM0030&32)		Tgu	Tabular	215	60					205	54	262.232
Shin Ghawazh	30 10.367	67 11.748	Tgu	Tabular	204	55					205	54	165.559
Shin Ghawazh	30 10.367	67 11.748	Tgu	Tabular	218	69					205	54	245.631
Shin Ghawazh	30 10.367	67 11.748	Tgu	Tabular	210	54					205	54	296.47
Shin Ghawazh	30 10.367	67 11.748	Tgu	Tabular	225	64					205	54	270.239
Shin Ghawazh	30 10.367	67 11.748	Tgu	Tabular	189	26					205	54	39.1451		45.65
Shin Ghawazh	30 10.367	67 11.748	Tgu	Tabular	196	36					205	54	41.3578
Shin Ghawazh	30 10.367	67 11.748	Tgu	Tabular	189	39					205	54	57.4178
Shin Ghawazh	30 10.367	67 11.748	Tgu	Foreset	190	46					222	56	100.372		127.22
Shin Ghawazh	30 10.367	67 11.748	Tgu	Foreset	183	53					222	56	115.188
Shin Ghawazh	30 10.367	67 11.748	Tgu	Foreset	184	51					222	56	111.459
Shin Ghawazh	30 10.367	67 11.748	Tgu	Tabular	196	44					222	56	92.9284
Shin Ghawazh	30 10.367	67 11.748	Tgu	Tabular	210	65					222	56	169.647
Shin Ghawazh	30 10.367	67 11.748	Tgu	Tabular	202	58					222	56	133.244
Shin Ghawazh	30 10.367	67 11.748	Tgu	Tabular	205	59					222	56	139.14
Shin Ghawazh	30 10.367	67 11.748	Tgu	Tabular	190	65					222	56	141.39
Shin Ghawazh	30 10.367	67 11.748	Tgu	Tabular	200	62					222	56	143.713
											270
Shin Ghawazh	30 10.362	67 11.699	Tgu	Foreset	205	65					217	57	177.814		137.12
Shin Ghawazh	30 10.362	67 11.699	Tgu	Foreset	213	58					217	57	142.43
Shin Ghawazh	30 10.362	67 11.699	Tgu	Foreset	210	58					217	57	134.72
Shin Ghawazh	30 10.362	67 11.699	Tgu	Foreset	212	56					217	57	112.141
Shin Ghawazh	30 10.362	67 11.699	Tgu	Foreset	195	57					217	57	120.957
Sinjdi
Sinjdi Mine area	30-07.273	67 14.902	Tgu	Tabular	298	39					282	26	322.508		329.65
Sinjdi Mine area	30-07.273	67 14.902	Tgu	Tabular	315	47					282	26	339.648
Sinjdi Mine area	30-07.273	67 14.902	Tgu	Tabular	305	46					282	26	326.042
Pir Ismail Ziart
Ibrahim Mari	30 03.674	67 25.819	Tgu	Foreset	105	54					82	65	206.59		170.9
Ibrahim Mari	30 03.674	67 25.819	Tgu	Foreset	109	69					82	65	168.388
Ibrahim Mari	30 03.674	67 25.819	Tgu	Foreset	110	68					82	65	171.148
Ibrahim Mari	30 03.674	67 25.819	Tgu	Foreset	100	75					82	65	144.759
Ibrahim Mari	30 03.674	67 25.819	Tgu	Foreset	108	65					82	65	177.573
Ibrahim Mari	30 03.674	67 25.819	Tgu	Foreset	104	63					82	65	182.576
Ibrahim Mari	30 03.674	67 25.819	Tgu	Foreset	103	77					82	65	144.657
Bibi Nani
Warro Jhal syn.	29 40.023	67 18.986	Tgu	Foreset	115	24					120	20	92.5702		49.37
Warro Jhal syn.	29 40.023	67 18.986	Tgu	Foreset	110	23					120	20	64.5722
Warro Jhal syn.	29 40.023	67 18.986	Tgu	Foreset	102	26					120	20	61.9146
Warro Jhal syn.	29 40.023	67 18.986	Tgu	Foreset	95	17					120	20	357.712
Warro Jhal syn.	29 40.023	67 18.986	Tgu	Foreset	112	20					120	20	26.2405
Warro Jhal syn.	29 41.109	67 19.833	Tgu	Foreset	161	33					128	41	252.712		250.26
Warro Jhal syn.	29 41.109	67 19.833	Tgu	Foreset	152	40					128	41	230.799
Warro Jhal syn.	29 41.109	67 19.833	Tgu	Foreset	128	43					128	41	128
Warro Jhal syn.	29 41.109	67 19.833	Tgu	Foreset	150	33					128	41	257.653
Warro Jhal syn.	29 41.109	67 19.833	Tgu	Foreset	124	38					128	41	346.772
Khost
S. Railway St.	30 12.829	67 34.589	Tgu	Foreset	217	52					220	38	209.043		173.85
S. Railway St.	30 12.829	67 34.589	Tgu	Foreset	203	38					220	38	123.283
S. Railway St.	30 12.829	67 34.589	Tgu	Foreset	208	47					220	38	173.409
S. Railway St.	30 12.829	67 34.589	Tgu	Foreset	215	49					220	38	179.278
S. Railway St.	30 12.829	67 34.589	Tgu	Foreset	215	42					220	38	179.278
S. Railway St.	30 12.829	67 34.589	Tgu	Foreset	205	42					220	38	146.649
S. Railway St.	30 12.829	67 34.589	Tgu	Foreset	215	51					220	38	203.078
S. Railway St.	30 12.779	67 34.564	Tgu	Foreset	215	82					205	50	223.29		199.52
S. Railway St.	30 12.779	67 34.564	Tgu	Foreset	195	59					205	50	159.849
S. Railway St.	30 12.779	67 34.564	Tgu	Foreset	216	72					205	50	231.538
S. Railway St.	30 12.779	67 34.564	Tgu	Foreset	206	62					205	50	209.241
S. Railway St.	30 12.779	67 34.564	Tgu	Foreset	204	58					205	50	198.926
S. Railway St.	30 12.779	67 34.564	Tgu	Foreset	207	70					205	50	210.483
S. Railway St.	30 12.779	67 34.564	Tgu	Foreset	198	56					205	50	159.864
Shahrig
PMDC Mines	30 07.662	67 45.823	Tgu	Foreset	212	78					217	80	104.366		102.73	CONGLOMERATE
PMDC Mines	30 07.662	67 45.823	(Congl. base)	Foreset	210	74					217	80	84.9213
PMDC Mines	30 07.662	67 45.823	"	Foreset	206	80					217	80	126.042
PMDC Mines	30 07.662	67 45.823	"	Foreset	240	78					217	80	314.218
PMDC Mines	30 07.662	67 45.823	"	Tabular	190	78					217	80	120.141
											270
PMDC Mines	30 07.662	67 45.823	Tgu	Foreset	223	74					228	79	91.6402
PMDC Mines	30 07.662	67 45.823	(SSt top	Foreset	222	76					228	79	110.255
PMDC Mines	30 07.662	67 45.823	on Congl)	Foreset	237	88					228	79	273.416
PMDC Mines	30 07.655	67 45.825	Tgu	Foreset	193	80					210	75	134.79		129.2
PMDC Mines	30 07.655	67 45.825	Tgu	Foreset	195	64					210	76	79.4922
PMDC Mines	30 07.655	67 45.825	Tgu	Foreset	199	65					210	77	74.1793
PMDC Mines	30 07.655	67 45.825	Tgu	Foreset	205	79					210	78	158.801
PMDC Mines	30 07.655	67 45.825	Tgu	Foreset	200	80					210	80	145.966
PMDC Mines	30 07.655	67 45.825	Tgu	Foreset	216	73					210	81	91.978
PMDC Mines	30 07.655	67 45.825	Tgu	Foreset	220	81					210	83	301.297
PMDC Mines	30 07.655	67 45.825	Tgu	Foreset	200	87					210	84	169.632
PMDC Mines	30 07.655	67 45.825	Tgu	Foreset	200	82					210	85	145.966
PMDC Mines	30 07.655	67 45.825	Tgu	Foreset	205	77					210	86	141.785
PMDC Mines	30 07.644	67 45.827	Tgu	Foreset	212	79					211	75	224.806		238.82
PMDC Mines	30 07.644	67 45.827	Tgu	Foreset	215	84					211	75	235.001
PMDC Mines	30 07.644	67 45.827	Tgu	Foreset	223	79					211	75	283.537
PMDC Mines	30 07.644	67 45.827	Tgu	Foreset	212	88					211	75	215.434
PMDC Mines	30 07.608	67 45.802	Tgu	Foreset	230	76					212	86	332.549		356.98
PMDC Mines	30 07.608	67 45.802	Tgu	Foreset	220	78					212	86	347.769
PMDC Mines	30 07.608	67 45.802	Tgu	Foreset	220	74					212	86	359.322
PMDC Mines	30 07.608	67 45.802	Tgu	Foreset	228	84					212	86	309.807
PMDC Mines	30 07.608	67 45.802	Tgu	Tabular	208	61					212	86	38.2756
PMDC Mines	30 07.608	67 45.802	Tgu	Tabular	210	64					212	86	33.9057
Kingri-1995
Kingri sec. area	30 25.86	69 47.16	Tgu	Foreset	63	55					110	55	5.99622		16.01
Kingri sec. area			Tgu	Foreset	80	59					110	55	20.5197
Kingri sec. area			Tgu	Foreset	79	70					110	55	40.5916
					-
Kingri sec. area	30 25.86	69 47.16	Tgu	Foreset	139	61					120	45	169.646		160.39
Kingri sec. area			Tgu	Foreset	145	71					120	45	166.763
Kingri sec. area			Tgu	Foreset	133	76					120	45	143.691
Kingri sec. area	30 25.86	69 47.16	Tgu	Foreset	136	55					125	55	218.161		171.71
Kingri sec. area			Tgu	Foreset	140	69					125	55	172.21
Kingri sec. area			Tgu	Foreset	125	58					125	55	125
Kingri sec. area	30 25.86	69 47.16	Tgu	Foreset	136	88					125	69	155.871		182.42
Kingri sec. area			Tgu	Foreset	181	86					125	69	205.743
Kingri sec. area			Tgu	Foreset	140	78					125	69	185.285
Kingri sec.	Near Locality 16		Tgu	Foreset	313	52					120	55	310.627		295.64
Kingri sec.	"		Tgu	Foreset	293	66					120	55	292.566
Kingri sec.	"		Tgu	Foreset	283	62					120	55	283.453
Kingri sec.			Tgu	Foreset	90	65					120	63	27.4445		27
Kingri sec.	30 26.041	69 47.227	Tgu	Foreset	142	60					114	46	181.129		191.33
Kingri sec.		(KPM98014)	Tgu	Foreset	158	40					120	43	231.01
Kingri sec.	"	"	Tgu	Foreset	132	54					114	40	163.757
Kingri sec.	30 25.858	69 47.141	Tgu	Foreset	143	64					130	62	213.207		208
Kingri sec.	"	"	Tgu	Foreset	148	66					130	62	210.199
Kingri sec.	"	"	Tgu	Foreset	136	64					130	62	200.87
Kingri sec.	"	"	Tgu	Foreset	168	51					118	60	234.378		2.99
Kingri sec.	"	"	Tgu	Foreset	100	41					125	48	4.54926
Kingri sec.	"	"	Tgu	Foreset	120	48					125	48	33.3266
Kingri sec.	"	"	Tgu	Foreset	114	46					125	48	17.3232
Kingri sec.	"	"	Tgu	Foreset	150	62					137	58	210.784		207.65
Kingri sec.	"	"	Tgu	Foreset	149	70					123	61	198.006
Kingri sec.	"	"	Tgu	Foreset	159	56					123	61	231.592
Kingri sec.	"	"	Tgu	Foreset	152	76					123	61	189.983
Kingri sec.	30 25.948	69 47.528	Tgu	Foreset	127	66					95	68	195.177		212.92
Kingri sec.	"	"	Tgu	Foreset	148	38					95	68	235.281
Kingri sec.	"	"	Tgu	Foreset	150	58					95	68	208.988
Kingri sec.	Level 1523m.		Tgu	Foreset	125	64					103	48	158.449		163.93
Kingri sec.	"	"	Tgu	Foreset	125	53					110	48	181.554
Kingri sec.	"	"	Tgu	Foreset	125	64					110	48	152.357
Kingri sec.	30 25.836	69 47.588	Tgu	Foreset	133	37					114	43	237.26		180.23
Kingri sec.	"	"	Tgu	Foreset	130	70					110	50	156.444
Kingri sec.	"	"	Tgu	Foreset	124	72					110	58	155.392
Kingri sec.	30 25.867	69 47.606	Tgu	Foreset	102	58					133	53	44.8697		129.61
Kingri sec.	"	"	Tgu	Foreset	138	61					133	53	162.062
Kingri sec.	"	"	Tgu	Foreset	122	70					102	55	156.848
Kingri sec.	Level 1665m.?		Tgu	Foreset	95	88					117	58	77.9465		54.84
Kingri sec.	Upper Toi		Tgu	Foreset	98	64					117	58	42.0315
Kingri sec.			Tgu	Foreset	90	69					117	58	44.899
Kingri sec.	Level 1667m.?		Tgu	Foreset	135	65					122	55	173.819		164.67
Kingri sec.	"	"	Tgu	Foreset	132	65					122	55	165.516
Kingri sec.	"	"	Tgu	Foreset	132	71					122	55	153.551
Kingri sec.	Level 1668m.?		Tgu	Foreset	70	35					117	57	338.512		348.64
Kingri sec.	"	"	Tgu	Foreset	86	50					117	57	2.30089
Kingri sec.	"	"	Tgu	Foreset	85	42					117	57	345.456
Kingri sec.	Level 1670m.?		Tgu	Foreset	100	30					114	34	349.844		333.28
Kingri sec.	"	"	Tgu	Foreset	90	27					114	34	344.098
Kingri sec.	"	"	Tgu	Foreset	109	24					114	34	305.456
Kingri sec.	Level 1674m.		Tgu	Foreset	102	39					115	50	330.134		338.67
Kingri sec.			Tgu	Foreset	90	38					115	50	341.723
Kingri sec.	"		Tgu	Foreset	75	36					115	50	343.838
Kingri sec.	Level 1677m.		Tgu	Foreset	135	56					113	47	182.638		179.03
Kingri sec.	Uppermost Toi		Tgu	Foreset	73	40					113	47	354.49
Kingri sec.			Tgu	Foreset	135	62					113	47	169.979
Kingri sec.	Level 1678m.		Tgu	Foreset	139	71					118	58	178.505		156.23
Kingri sec.	Uppermost Toi		Tgu	Foreset	130	77					118	58	150.805
Kingri sec.			Tgu	Foreset	125	75					118	58	140.193
Kingri sec.	Level 1680m.		Tgu	Foreset	141	58					122	52	196.594		199.33
Kingri sec.	Uppermost Toi		Tgu	Foreset	140	55					122	52	205.766
Kingri sec.			Tgu	Foreset	144	60					122	52	194.812
Kingri sec.	Level 1684m.		Tgu	Foreset	126	70					119	59	150.456		184.81
Kingri sec.			Tgu	Foreset	150	70					119	59	194.887
Kingri sec.			Tgu	Foreset	140	61					119	59	208.09
Kingri sec.	Level 1696m.		Tgu	Foreset	131	80					111	75	188.969		182.37
Kingri sec.			Tgu	Foreset	132	80					111	75	189.746
Kingri sec.			Tgu	Foreset	130	88					111	75	168.054
Kingri sec.	Level 1700m.		Tgu	Foreset	151	35					114	40	230.967		233
Kingri sec.			Tgu	Foreset	147	34					114	40	233.689
Kingri sec.			Tgu	Foreset	148	34					114	40	233.618
Kingri sec.	Level 1708m		Tgu	Foreset	210	20					130	23	262.854		245.34
Kingri sec.			Tgu	Foreset	185	32					130	23	226.775
Kingri sec.			Tgu	Foreset	180	22					130	23	246.107
Kingri sec.			Tgu	Foreset	104	43					122	58	339.314		10.44
Kingri sec.	30 25.734	69 47.647	Tgu	Foreset	107	50					122	58	354.342
Kingri sec.			Tgu	Foreset	115	62					122	58	63.6272
Kingri sec.	30 26.151	69.47.974	Tgu	Foreset	110	55					116	49	75.8727		62.62
Kingri sec.	"	"	Tgu	Foreset	115	55					116	49	108.206
Kingri sec.	"	"	Tgu	Foreset	107	45					116	49	351.696
Kingri sec.	"	"	Tgu	Foreset	132	62					107	57	190.563		120
Kingri sec.	"	"	Tgu	Foreset	130	74					107	57	163.272
Kingri sec.	"	"	Tgu	Foreset	139	67					107	57	185.7
Kingri sec.	30 26.745	69 47.822	Tgu	Foreset	130	65					111	52	167.601		167
Kingri sec.	"	"	Tgu	Foreset	130	70					111	52	158.79
Kingri sec.	"	"	Tgu	Foreset	135	66					111	52	173.516
Maizarluna
Maizarluna Sec.	30 31.91	69 51.39	Tgu	Foreset	128	76					108	50	147.628		151.33
Maizarluna Sec.	"	"	Tgu	Foreset	126	71					108	50	149.641
Maizarluna Sec.	"	"	Tgu	Foreset	133	75					108	50	156.242
Maizarluna Sec.											90
Maizarluna Sec.	30 31.91	69 51.39	Tgu	Foreset	154	59					127	57	219.352		227.34
Maizarluna Sec.	"	"	Tgu	Foreset	155	55					127	57	229.765
Maizarluna Sec.	"	"	Tgu	Foreset	145	54					127	57	233.468
Maizarluna Sec.	30 31.91	69 51.39	Tgu	Foreset	160	48					130	66	263.248		271.33
Maizarluna Sec.	"	"	Tgu	Foreset	155	40					130	66	279.592
Maizarluna Sec.	"	"	Tgu	Foreset	154	46					130	66	271.461
Maizarluna Sec.	30 31.928	69 51.593	Tgu	Foreset	120	80					125	62	109.392		100.53
Maizarluna Sec.	"	"	Tgu	Foreset	123	76					125	62	117.023
Maizarluna Sec.	"	"	Tgu	Foreset	110	75					125	62	74.9629
Maizarluna Sec.	"	"	Tgu	Foreset	192	79					109	57	204.561		213.65
Maizarluna Sec.			Tgu	Foreset	201	75					109	57	212.706
Maizarluna Sec.			Tgu	Foreset	203	64					109	57	223.139
Maizarluna Sec.	"	"	Tgu	Foreset	150	58					116	50	200.462		217.94
Maizarluna Sec.			Tgu	Foreset	155	52					116	50	214.936
Maizarluna Sec.			Tgu	Foreset	157	40					116	50	239.109
Maizarluna Sec.	"	"	Tgu	Foreset	144	55					111	53	206.713		212
Maizarluna Sec.			Tgu	Foreset	143	53					111	53	210.791
Maizarluna Sec.			Tgu	Foreset	141	50					111	53	217.589
Maizarluna Sec.	30 31.842	69 51.713	Tgu	Foreset	136	65					130	66	231.615		132.31
Maizarluna Sec.	"	"	Tgu	Foreset	127	70					130	66	94.6118
Maizarluna Sec.	"	"	Tgu	Foreset	127	74					130	66	110.055
Maizarluna Sec.	"	"	Tgu	Foreset	100	60					127	57	37.1351		25.42
Maizarluna Sec.			Tgu	Foreset	95	47					127	57	5.85839
Maizarluna Sec.			Tgu	Foreset	97	59					127	57	33.3092
Mughal Kot
Baska Village	31 28.952	70 08.487	Tgu	Foreset	110	44					58	20	132.107		96.73
Baska Village	"	"	Tgu	Foreset	104	31					58	20	141.375
Baska Village	"	"	Tgu	Foreset	92	42					58	20	112.478
Baska Village	"	"	Tgu	Foreset	60	36					58	20	62.2614
Baska Village	"	"	Tgu	Foreset	46	28					58	20	21.0004
Baska Village	"	"	Tgu	Tabular	-	-					59	21	85
Ghorkhezai	"	"	Tgu	Tabular	-	-					55	34	123.429
Kalat
Microwave St. Sec.	28 25.244	66 16.664	Tgu	Trough			352	61	12	47	20	48		229	229
Microwave St. Sec.	"	"	Tgu	Trough			37	28	2	26	8	37		192
Sor Range
Shin Ghawazh	30 10.414	67 11.689	Tgu	Trough			225	73	205	59	205	54		172	87.5
Shin Ghawazh	30 10.414	67 11.689	Tgu	Trough			210	30	236	41	205	54		3
Shin Ghawazh	30 10.367	67 11.748	Tgu	Trough			218	61	202	47	205	54		341	340.25
Shin Ghawazh	30 10.367	67 11.748	Tgu	Trough			229	54	216	36	205	54		333
Shin Ghawazh	30 10.367	67 11.748	Tgu	Trough			210	34	225	44	205	54		346
Shin Ghawazh	30 10.367	67 11.748	Tgu	Trough			229	57	226	53	205	54		341
Shin Ghawazh	30 10.367	67 11.748	Tgu	Trough			200	49	205	58	220	52		143	322.33
Shin Ghawazh	30 10.367	67 11.748	Tgu	Trough			210	61	202	45	220	52		144
Shin Ghawazh	30 10.367	67 11.748	Tgu	Trough			195	40	202	53	222	56		140
Shin Ghawazh	30 10.328	67 11.628	Tgu	Trough			182	47	34	34	200	35		77	280.52
Shin Ghawazh	30 10.328	67 11.628	Tgu	Trough			193	54	225	45	222	50		53
Shin Ghawazh	30 10.328	67 11.628	Tgu	Trough			187	76	195	23	222	50		104
Shin Ghawazh	30 10.328	67 11.628	Tgu	Trough			195	57	210	23	222	50		103
Shin Ghawazh	30 10.328	67 11.628	Tgu	Trough			203	44	207	48	222	50		157
Shin Ghawazh	30 10.328	67 11.628	Tgu	Trough			203	57	214	22	222	50		112
Sinjdi
Sinjdi	30 07.303	67 14.739	Tgu	Ripple	-	-					275	19	120		120
Sinjdi Mine Area	30 07.303	67 14.739	Tgu	Trough			216	36	326	21	275	19		106	293.39
Sinjdi Mine Area	30 07.303	67 14.739	Tgu	Trough			260	39	358	16	275	19		166
Sinjdi Mine Area	30 07.484	67 14.496	Tgu	Trough			170	39	262	64	170	32		84
Sinjdi Mine Area	30 07.484	67 14.496	Tgu	Trough			176	36	272	57	170	32		279
Sinjdi Mine Area	30 07.484	67 14.496	Tgu	Trough			151	26	264	46	170	32		108
Sinjdi Mine Area	30 07.484	67 14.496	Tgu	Trough			163	44	259	48	170	32		123
Less Daghari
Plant Foss. Loc.	200m. in north to St. 2		Tgu	Trough			245	59	265	36	252	50		5
HML Mines	30 04.219	67 15.130	Tgu	Trough			280	24	273	43	266	31		180	4.65
HML Mines	30 04.219	67 15.130	Tgu	Trough			263	16	275	46	266	31		3
HML Mines	30 04.219	67 15.130	Tgu	Trough			252	17	276	47	266	31		183
HML Mines	30 04.219	67 15.130	Tgu	Trough			258	17	277	44	266	31		5
HML Mines	30 04.219	67 15.130	Tgu	Trough			252	21	277	45	266	31		183
Pir Ismail Ziart
Ibrahim Mari	30 03.674	67 25.819	Tgu	Trough			107	79	93	64	84	70		222	79.77
Ibrahim Mari	30 03.674	67 25.819	Tgu	Trough			111	62	91	53	84	70		245
Ibrahim Mari	30 03.674	67 25.819	Tgu	Trough			101	62	92	58	84	70		243
Ibrahim Mari	30 03.674	67 25.819	Tgu	Trough			86	62	110	54	84	70		303
Ibrahim Mari	30 03.674	67 25.819	Tgu	Trough			85	55	99	58	84	70		228
Ibrahim Mari	30 03.674	67 25.819	Tgu	Trough			83	53	95	61	84	70		166
Ibrahim Mari	30 03.636	67 25.897	Tgu	Trough			109	55	87	64	80	70		293	289.42
Ibrahim Mari	30 03.636	67 25.897	Tgu	Trough			88	74	116	60	80	70		116
Ibrahim Mari	30 03.636	67 25.897	Tgu	Trough			96	81	115	69	80	70		118
Ibrahim Mari	30 03.636	67 25.897	Tgu	Trough			78	74	94	80	80	70		104
Ibrahim Mari	30 03.636	67 25.897	Tgu	Trough			121	59	88	61	80	70		276
Raja Mines	30 02.902	67 24.170	Tgu	Trough			228	29	253	27	200	30		244	79.12
Raja Mines	30 02.902	67 24.170	Tgu	Trough			265	32	240	23	200	30		31
Raja Mines	30 02.902	67 24.170	Tgu	Trough			190	30	217	11	200	30		87
Raja Mines	30 02.902	67 24.170	Tgu	Trough			240	22	265	38	200	30		17
Raja Mines	30 02.902	67 24.170	Tgu	Trough			235	22	222	41	200	30		295
Raja Mines	30 02.902	67 24.170	Tgu	Trough			256	15	235	35	200	30		306
Raja Mines	30 02.902	67 24.170	Tgu	Trough			292	04	202	33	200	30		285
Raja Mines	30 03.855	67 24.049	Tgu	Trough			37	56	348	51	355	64		179	36.77
Raja Mines	30 03.855	67 24.049	Tgu	Trough			28	42	354	39	355	64		180
Raja Mines	30 03.855	67 24.049	Tgu	Trough			18	39	339	54	355	64		207
Raja Mines	30 03.855	67 24.049	Tgu	Trough			25	67	358	68	355	64		3
Raja Mines	30 03.855	67 24.049	Tgu	Trough			30	53	355	60	355	64		198
Raja Mines	30 03.855	67 24.049	Tgu	Trough			346	56	20	77	355	64		144
Raja Mines	30 03.855	67 24.049	Tgu	Trough			345	66	375	46	355	64		217
Raja Mines	30 03.855	67 24.049	Tgu	Trough			355	80	30	62	355	64		30
Raja Mines	30 03.855	67 24.049	Tgu	Trough			332	61	5	54	355	64		186
Raja Mines	30 03.855	67 24.049	Tgu	Trough			350	70	22	69	355	64		1
Raja Mines	30 03.855	67 24.049	Tgu	Trough			2	61	42	40	355	64		222
Raja Mines	30 03.645	67 24.738	Tgu	Trough			310	44	262	28	301	32		260	63.23
Raja Mines	30 03.645	67 24.738	Tgu	Trough			305	36	314	11	301	32		31
Raja Mines	30 03.645	67 24.738	Tgu	Trough			305	30	270	26	301	32		96
Raja Mines	30 03.645	67 24.738	Tgu	Trough			305	39	220	07	301	32		46
Bibi Nani
Warro Jhal syn.	29 41.109	67 19.833	Tgu	Trough			131	44	132	20	128	41		219	219
Shahrig
PMDC Mines	30 07.662	67 45.823	Tgu	Trough			230	60	225	70	222	79		109	109
PMDC Mines	30 07.662	67 45.823	Tgu	Trough							222	79
PMDC Mines	30 07.608	67 45.802	Tgu	Trough			230	78	210	88	212	86		240	286.85
PMDC Mines	30 07.608	67 45.802	Tgu	Trough			235	79	205	2	212	86		303
PMDC Mines	30 07.608	67 45.802	Tgu	Trough			230	69	202	89	212	86		69
PMDC Mines	30 07.608	67 45.802	Tgu	Trough			218	66	208	8	212	86		301
Kingri
Kingri sec.		Level 1715m?	Tgu	Trough			143	59	102	69	137	55		146	315.45
Kingri sec.		Level 1734m?	Tgu	Trough			143	67	106	70	137	55		137
Kingri sec.		Level 1750m?	Tgu	Trough			150	72	119	68	135	70		126
Kingri sec.		Level 1755m?	Tgu	Trough			143	70	109	65	124	54		91
Kingri sec.		Level 1770m?	Tgu	Trough			164	55	109	52	137	54		138
Kingri sec.			Tgu	Trough			139	70	125	76	131	55		173
Kingri sec.	30 26.745	69 47.822	Tgu	Trough			145	48	110	76	111	52		180	343.5
Kingri section	30 26.745	69 47.822	Tgu	Trough			152	32	90	60	118	52		147
Maizarluna Sec.	30 31.928	69 51.593	Tgu	Trough			149	43	122	73	131	50		194	60.93
Maizarluna Sec.	"	"	Tgu	Trough			160	59	120	75	131	50		174
Maizarluna Sec.	"	"	Tgu	Trough			160	65	139	90	131	50		230
Maizarluna Sec.	"	"	Tgu	Trough			129	58	98	69	122	65		136	136
Maizarluna Sec.	30 31.875	69 51.629	Tgu	Trough			150	42	112	62	124	56		158
Maizarluna Sec.	"	"	Tgu	Trough			140	45	104	70	106	50		182
Maizarluna Sec.	"	"	Tgu	Trough			144	51	121	59	130	66		112	110
Maizarluna Sec.	30 31.842	69 51.713	Tgu	Trough			144	49	110	64	128	62		114
Maizarluna Sec.	"	"	Tgu	Trough			90	30	125	31	116	35		106
Mughal kot
Baska Village	31 28.952	70 08.487	Tgu	Trough			60	52	40	27	55	49		167	30.72
Baska Village	"	"	Tgu	Trough			60	47	27	32	55	49		191
Baska Village	"	"	Tgu	Trough			112	27	115	21	58	20		190
Baska Village	31 29.201	70 08.420	Tgu	Trough			80	48	53	39	60	25		38	60.22
Baska Village	"	"	Tgu	Trough			78	34	50	33	60	25		60
Baska Village	"	"	Tgu	Trough			28	38	81	30	60	30		70
Baska Village	"	"	Tgu	Trough			10	31	48	39	60	30		15
Baska Village	"	"	Tgu	Trough			40	39	8	26	60	30		353
Ghorkhezai	31 30.828	70 06.948	Tgu	Trough			73	54	102	57	55	34		67	67
PAB FORMATION
Marap Valley
Bitagu Area	28 47.583	66 14.822	Tgd?/Pab Sst.	Foreset	303	38					308	29	288.835		292.96
Bitagu Area	"	"	Tgd?/Pab Sst.	Foreset	310	33					308	29	323.303
Bitagu Area	"	"	Tgd?/Pab Sst.	Foreset	301	37					308	29	279.53
Bitagu Area	"	"	Tgd?/Pab Sst.	Foreset	304	34					308	29	283.593
Bitagu Area	"	"	Tgd?/Pab Sst.	Foreset	303	39					308	29	290.27
Kingri
Hingulun Nala	30 24.678	69 58.995	Pab Sst.	Foreset	290	51					294	43	272.524		264
Hingulun Nala			Pab Sst.	Foreset	279	60					294	43	254.384
Hingulun Nala			Pab Sst.	Foreset	289	50					294	43	264.856
Hingulun Nala			Pab Sst.	Foreset	290	55					279	30	299.887		300
Hingulun Nala			Pab Sst.	Foreset	291	56					279	30	301.185
Hingulun Nala			Pab Sst.	Foreset	289	54					279	30	298.528
Hingulun Nala			Pab Sst.	Foreset	288	59					293	40	279.98		258.28
Hingulun Nala			Pab Sst.	Foreset	271	50					293	40	227.523
Hingulun Nala			Pab Sst.	Foreset	284	55					293	40	265.963
Hingulun Nala			Pab Sst.	Foreset	334	51					300	50	38.8868		85.96
Hingulun Nala			Pab Sst.	Foreset	295	34					300	50	129.979
Hingulun Nala			Pab Sst.	Foreset	316	36					300	50	87.7277
Hingulun Nala			Pab Sst.	Foreset	310	40					294	32	350.324		340.32
Hingulun Nala			Pab Sst.	Foreset	304	40					294	32	334.456
Hingulun Nala			Pab Sst.	Foreset	307	42					294	32	337.412
Hingulun Nala			Pab Sst.	Trough							290	40		229	229
Hingulun Nala
Hingulun Nala			Pab Sst.	Foreset	291	59					277	35	305.253		314.31
Hingulun Nala			Pab Sst.	Foreset	299	52					277	35	327.266
Hingulun Nala			Pab Sst.	Foreset	292	55					277	35	310.596
Hingulun Nala	30 24.755	69 58.871	Pab Sst.	Foreset	321	39					299	33	13.3381		12.01
Hingulun Nala			Pab Sst.	Foreset	314	39					299	33	1.0166
Hingulun Nala			Pab Sst.	Foreset	322	37					299	33	21.8175
Hingulun Nala			Pab Sst.	Foreset	308	65					293	40	323.453		324.99
Hingulun Nala			Pab Sst.	Foreset	304	66					293	40	315.277
Hingulun Nala			Pab Sst.	Foreset	313	60					293	40	337.443
Hingulun Nala			Pab Sst.	Foreset	322	50					302	44	16.7772		9.34
Hingulun Nala			Pab Sst.	Foreset	319	54					302	44	359.927
Hingulun Nala			Pab Sst.	Foreset	326	54					302	44	11.4533
Hingulun Nala			Pab Sst.	Foreset	325	40					302	44	54.9814		42.42
Hingulun Nala			Pab Sst.	Foreset	330	51					302	44	23.2074
Hingulun Nala			Pab Sst.	Foreset	336	42					302	44	49.3903
Hingulun Nala			Pab Sst.	Foreset	299	54					290	40	318.377		287.05
Hingulun Nala			Pab Sst.	Foreset	266	66					290	40	245.481
Hingulun Nala			Pab Sst.	Foreset	293	67					290	40	296.07
Hingulun Nala			Pab Sst.	Foreset	280	49					291	40	246.357		251.54
Hingulun Nala			Pab Sst.	Foreset	286	55					291	40	275.442
Hingulun Nala			Pab Sst.	Foreset	265	58					291	40	234.2
Hingulun Nala			Pab Sst.	Foreset	297	56					279	43	331.684		318.65
Hingulun Nala			Pab Sst.	Foreset	287	56					279	43	306.777
Hingulun Nala			Pab Sst.	Foreset	289	54					279	43	316.692
Hingulun Nala			Pab Sst.	Foreset	276	55					299	38	245.985		255.3
Hingulun Nala			Pab Sst.	Foreset	283	50					299	38	250.151
Hingulun Nala			Pab Sst.	Foreset	286	60					299	38	270.387
Hingulun Nala	30 24.819	69 58.486	Pab Sst.	Foreset	288	64					276	35	297.736		299.33
Hingulun Nala			Pab Sst.	Foreset	286	62					276	35	295.091
Hingulun Nala			Pab Sst.	Foreset	289	56					276	35	304.677

## Sheet: Table S2
Table S2 - Point count modes of early Paleogene sandstones studied here.
Area/	Sample #	Latitude	Longitude	Fm	Feldspar	Quartz	Rock Fragment %				Lst+	Matrix/Cement		Opaque
Localities					%	%	Lst. Frag	Chert	Igneous	Total	Calcite	Calcite	Lithic
Kohat-Banda Daud Shah				KULDANA FORMATTION
Mir Ali (N. Waziristan)	IHK001-23	32.9643	70.3305	Kuldana	1.73333	19.7667	58.8667	0.2	2	61.0667	76.1667	17.3	0	0
Bahdur Khel Salt Mine	IHK001-28A	33.172	70.9997	Kuldana	0.4	37.0667	37.9667	1.26667	17.1	56.3333	43.2667	5.3	0	0.6
Mami Khel	IHK001-29B	33.3621	71.1986	Kuldana	1.76667	0.633333	39.0667	1.3	21.3333	61.7	74.6	35.5333	0	0
Mami Khel	IHK001-30	33.3623	71.1987	Kuldana	0	16.6333	79.7667	0.6	2.86667	83.2333	79.7667	0	0	0
Mardan Khel	IHK001-32	33.3469	70.9895	Kuldana	0	7.73333	88.6667	2.2	1.1	91.9667	88.6667	0	0	0
Nari Panos	IHK001-34	33.1688	71.1573	Kuldana	0.2	56.6333	12.8667	1.1	7.5	21.4667	34.1667	21.3	0	0
Ludhi Khel	IHK001-35B	33.5896	71.1836	Kuldana	0.2	16.3667	37.3	24.3333	6.2	67.8333	52.6	15.3	0	0
			Average		0.614286	22.119	50.6429	4.42857	8.3	63.3714	64.1762	13.5333	0	0.0857143
Loralai-Dera Ismail Khan UPPER GHAZIJ FORMATTION
Kingri	98UTL	30.431	69.7857	Tgu	0	16.6333	0	0.666667	0	0.666667	66.9667	66.9667	15.5333	0
Kingri	98UTS	30.431	69.7857	Tgu	0.2	74.2	1.1	0.866667	0	1.96667	24.6333	23.5333	0	0
Kingri	PM-92-2	30.431	69.7857	Tgu	0.2	75.1	0	1.76667	0.4	2.16667	22.2	22.2	0	0
Kingri	PM-92-4	30.431	69.7857	Tgu	0.2	54.3667	0	0.866667	0.2	1.06667	44.1667	44.1667	0	0
			Average		0.15	55.075	0.275	1.04167	0.15	1.46667	39.4917	39.2167	3.88333	0
Quetta
PMDC Shahrig	Sharig-1	30.1277	67.7634	Tgu	4.86667	6.43333	9.96667	4.8	24.6333	39.4	59.2667	49.3	0	0
Khost	IHK003-18	30.213	67.6261	Tgu	1.26667	6.43333	37.3		35.7	73	56.3667	19.0667	0	0
PIZ. (Ibrahim Marri Mines)	PIZ-PM-6	30.0612	67.4303	Tgu	5.5	1.73333	24.1667	2.83333	45.8333	72.8333	46.3667	22.2	0	0.2
PIZ. (Ibrahim Marri Mines)	PIZ-PM-4	30.0612	67.4303	Tgu	4.63333	4.66667	68.1667	1.93333	1.3	71.4	79	10.8333	0	8.2
PIZ. (Ibrahim Marri Mines)	PIZ-PM-1	30.0612	67.4303	Tgu	3.33333	2.83333	78.3667	2.53333	0.633333	81.5333	90.7667	12.4	0	0.2
PIZ. (Ibrahim Marri Mines)	A-UG-90	30.0612	67.4303	Tgu	0.833333	5.73333	58.8667	2.63333	7.76667	69.2667	82.0667	23.2	0	0.633333
Sor Range (Shin Ghawaza)	SG-PM-10	30.1745	67.1946	Tgu	2.8	6.6	60.1	1.03333	3.3	64.4333	85.6333	25.5333	0	0.433333
Sor Range (Shin Ghawaza)	SG-PM-9	30.1721	67.1937	Tgu	0.4	5.3	73.3	2.16667	3.73333	79.2	88.1667	14.8667	0	0
Sor Range (Shin Ghawaza)	SG-PM-7	30.1721	67.1937	Tgu	3.06667	6.2	63.7	3.96667	6.16667	73.8333	79.8667	16.1667	0	0.433333
Sor Range (Shin Ghawaza)	SG-14-91	30.1727	67.195	Tgu	1.5	3.3	83.9667	6.4	1.3	91.6667	87	3.03333	0	0.2
Sor Range (Shin Ghawaza)	SG-10-91	30.1721	67.1938	Tgu	0.833333	3.93333	88.8667	4.63333	0.4	93.9	89.5	0.633333	0	0.433333
Sor Range (Shin Ghawaza)	SG-8-91	30.1721	67.1938	Tgu	1.3	13.7333	66.6	10.8667	4.83333	82.3	69	2.4	0	0
Mach (Mughal Mines)	M-11-91	29.8583	67.307	Tgu	0	13.5333	32.2	11	7.5	50.7	67.7	35.5	0	0
Mach (Mughal Mines)	M-6-91	29.8583	67.307	Tgu	0.866667	9.96667	45.9667	9.3	9.53333	64.8	69.9333	23.9667	0	0.2
			Average		2.22857	6.45714	56.5381	4.57857	10.9024	72.019	75.0452	18.5071	0	0.780952
Kalat
Johan (Sarawan Nala)	SR-9-91	29.2887	66.8824	Tgu	0	0.4	54.7	2.6	0.2	57.5	96.7667	42.0667	0	0
Shaikhri	IHK-005	29.2158	66.8219	Tgu	0	2.43333	65.5333	10.5	1.96667	78	84.8	19.2667	0	0
Harboi Hills	IHK-004	29.0289	66.7495	Tgu	0.2	1.96667	62.6333	4.13333	2.6	69.3667	90.8	28.1667	0	0
Surab (microwave station)	IHK-0023	28.4172	66.2793	Tgu	0	7.06667	64.6	10.1667	7.96667	82.7333	74.5667	9.96667	0	0
			Average		0.05	2.96667	61.8667	6.85	3.18333	71.9	86.7333	24.8667	0	0
Loralai-Dera Ismail Khan MIDDLE GHAZIJ FORMATTION (Tgm)
Nilli Kach (Tank area)	IHK001-14	32.135	70.0091	Tgm	2.2	35.7333	15.7333	2.6	15.0667	33.4	43.9333	28.2	0	0.2
Drazinda, Lumai area	IHK001-12	31.7316	70.0606	Tgm	0	49.3	21.3	2.2	0.866667	24.3667	47.4667	26.1667	0	0
Mughal Kot	IHK001-08	31.4964	70.1169	Tgm	0.2	78.4	0	1.53333	1.76667	3.3	17.9667	17.9667	0	0
Mughal Kot	IHK001-06	31.4672	70.1065	Tgm	5.1	52.6333	20.8667	0.833333	18.8667	40.5667	20.8667	0	1.53333	0
Mughal Kot	IHK001-01	31.4617	70.1071	Tgm	0.633333	85.0667	0	0	9.73333	9.73333	4.43333	4.43333	0	0
Mughal Kot	IHK0037	31.4598	70.0955	Tgm	0.2	69.2	1.3	0.2	11.3	12.8	18.8	17.5	0	0
Mughal Kot	IHK0035	31.4591	70.0887	Tgm	0.2	67.1	0	0.2	4.2	4.4	0.666667	0.666667	27.5333	0
Kingri	Sst. Kingri	30.45	69.745	Tgm	1.1	74.8667	0.4	0.6	1.76667	2.76667	21.6	21.2	0	0
Kingri	MS-98-1	30.45	69.745	Tgm	0.433333	55.0667	4.63333	2.6	2.86667	10.1	38.8333	34.2	0	0
Kingri	PM-92-1	30.44	69.74	Tgm	0	65.0667	2.86667	2.6	2.2	7.66667	29.9333	27.0667	0	0
Duki	IHK003-5B	30.1366	68.5059	Tgm	6.6	85.3	0	0	7.53333	7.53333	0	0	0	0.4
Duki	IHK003-11	30.1385	68.658	Tgm	2.4	53.5	0	0.4	1.5	1.9	41.5333	41.5333	0	0.433333
Duki	PM-92-5	30.1456	68.509	Tgm	9.03333	44	28.6333	3.5	5.53333	37.6667	37.7	9.06667	0	0
Duki	PM-92-6	30.1456	68.509	Tgm	4.4	48.8333	28.8667	5	3.3	37.1667	38.1667	9.3	0	0
			Average		2.32143	61.719	8.9	1.59048	6.17857	16.669	25.85	16.95	2.07619	0.0738095
Quetta
Shahrig PMDC Mines	IHK003-21	30.1327	67.7653	Tgm	5.06667	7.93333	25.7333	1.3	27.9333	54.9667	57.5	31.7667	0	0
Khost	IHK003-17	30.2151	67.5764	Tgm	4.6	7.4	5.96667	4.73333	42.8	53.5	40.1667	34.2	0	0
Khost	IHK003-14	30.2167	67.5771	Tgm	6.36667	13.9667	5.73333	2.63333	26.1667	34.5333	50.8667	45.1333	0	0
PIZ. (Ibrahim Marri Mines)	A-40-90	30.0528	67.4218	Tgm	0.2	2.66667	69.9667	2.2	5.53333	77.7	89.0333	19.0667	0	0
PIZ. (Ibrahim Marri Mines)	A-36-90	30.0528	67.4218	Tgm	5.66667	0.833333	25.3	1.73333	46.8667	73.9	44.6	19.3	0	0
PIZ. (Ibrahim Marri Mines)	A-26-90	30.0528	67.4218	Tgm	2.43333	2.63333	21.5	0.666667	43	65.1667	51.2333	29.7333	0	0
PIZ. (Ibrahim Marri Mines)	A-24-90	30.0528	67.4218	Tgm	0.4	5.73333	49.9667	5.73333	4.6	60.3	82.3667	32.4	0	0.866667
PIZ. (Ibrahim Marri Mines)	A-16-90	30.0528	67.4218	Tgm	2.13333	4.2	43.3	4	6.9	54.2	82.8333	39.5333	0	0
PIZ. (Ibrahim Marri Mines)	A-14-90	30.0528	67.4218	Tgm	1.1	6.63333	53.0667	1.73333	3.96667	58.7667	85.9333	32.8667	0	0.2
PIZ. (Ibrahim Marri Mines)	A-12-90	30.0528	67.4218	Tgm	1.53333	6.4	47.5333	5.9	7.1	60.5333	78.8	31.2667	0	0
PIZ. (Ibrahim Marri Mines)	A-11-90	30.0528	67.4218	Tgm	0.433333	6.86667	54.6333	1.06667	17.7667	73.4667	73.7	19.0667	0	0
PIZ. (Ibrahim Marri Mines)	A-10-90	30.0528	67.4218	Tgm	1.3	9.06667	39.7667	0.4	15.3	55.4667	73.2	33.4333	0	0.433333
Sor Range (Shin Ghawaza)	SG-PM-3-91	30.1721	67.1938	Tgm	3.1	6.2	74.4	5.26667	3.06667	82.7333	82.1667	7.76667	0	0.2
Sor Range, Sinjdi area	Sinjdi-PM-1	30.1217	67.2456	Tgm	2	5.5	70.8667	3.03333	5.06667	78.9667	84.1667	13.3	0	0.2
Mach. (Gishtari Mines)	GN-2-91	29.8583	67.307	Tgm	0.633333	2.86667	48.4333	3.3	2.63333	54.3667	90.4	41.9667	0	0
Mach. (Gishtari Mines)	GN-3-91	29.8583	67.307	Tgm	0	4.6	42.1667	7.06667	2.16667	51.4	85.9	43.7333	0	0
Mach. (Gishtari Mines)	GN-11-91	29.8583	67.307	Tgm	0.2	3.53333	45.0667	2.2	4.6	51.8667	89.2667	44.2	0	0
			Average		2.18627	5.70784	42.5529	3.11569	15.6157	61.2843	73.0667	30.5137	0	0.111765
Kalat
Johan (Sarawan Nala)	SR-5-91	29.2887	66.8824	Tgm	0.2	1.3	47.3333	5.03333	4.4	56.7667	88.8667	41.5333	0	0
Johan (Sarawan Nala)	SR-6-91	29.2887	66.8824	Tgm		1.76667	53.3	7.26667	4.43333	65	86.3667	33.0667	0	0
Johan (Sarawan Nala)	SR-2-91	29.2887	66.8824	Tgm	0.2	3.06667	49.5	5.93333	4.4	59.8333	86.1333	36.6333	0	0
Harboi Hills	IHK-002	29.0239	66.7526	Tgm	1.06667	1.3	62.8667	6.2	3.3	72.3667	87.7333	24.8667	0	0
Harboi Hills	IHK-003	29.025	66.7523	Tgm	1.96667	0.4	65.2667	7.86667	3.96667	77.1	85.4333	20.1667	0	0
			Average		0.686667	1.56667	55.6533	6.46	4.1	66.2133	86.9067	31.2533	0	0
Loralai-Dera Ismail Khan LOWER GHAZIJ FORMATTION (Tgl)
Mughal Kot	IHK0032	31.4762	70.0861	Tgl	6.2	44.7	0	1.2	25.0667	26.2667	4.2	4.2	18.6333	0
Kingri	SG-98-1	30.4367	69.7745	Tgl	0.2	81.3	0.2	1.06667	0.633333	1.9	16.6	16.4	0	0
Duki	IHK003-02	30.1263	68.4851	Tgl	0.2	69.9667	0	0.633333	12.8333	13.4667	15.9667	15.9667	0	0
			Average		2.2	65.3222	0.0666667	0.966667	12.8444	13.8778	12.2556	12.1889	6.21111	0
Quetta
PIZ. (Ibrahim Marri Mines)	A-8-90	30.0528	67.4218	Tgl	1.96667	2.4	55.9667	1.53333	6.63333	64.1333	87.0333	31.0667	0	0.2
PIZ. (Ibrahim Marri Mines)	A-5-90	30.0528	67.4218	Tgl	1.53333	1.96667	51.5333	2	6.63333	60.1667	84.8667	33.3333	0	2.9
PIZ. (Ibrahim Marri Mines)	A-3-90	30.0528	67.4218	Tgl	1.96667	5.1	56.8	4.8	7.06667	68.6667	80.9667	24.1667	0	0
PIZ. (Ibrahim Marri Mines)	A-1-90	30.0528	67.4218	Tgl	2.36667	2.43333	49.5333	2.16667	9.7	61.4	83.0333	33.5	0	0.4
			Average		1.95833	2.975	53.4583	2.625	7.50833	63.5917	83.975	30.5167	0	0.875
KACH SEQUENCE (Tks)
Shahrig (PMDC Mines)	IHK003-31	30.1941	67.732	TKs	2.2	7.83333	17.2	2.63333	48.6	68.4333	38.6	21.4	0.2	0
Kach	Kach-1	30.4347	67.2975	TKs	10.8667	8.63333	15.3	7.3	44	66.6	26.6	11.3	0	2.4
Kach	Kach-3	30.4347	67.2975	TKs	8.16667	5.76667	10.4	1.3	61	72.7	23.2667	12.8667	0	0.4
Kach (Ahmadun)	IHK-0040	30.4653	67.3474	TKs	7.76667	4.83333	7.06667	7.46667	44.3	58.8333	35.2333	28.1667	0	0
Kach (Umai)	IHK003-34	30.4571	67.1972	TKs	1.53333	32.2	26.6333	1.06667	25.0667	52.7667	39.9333	13.3	0.2	0
Kach (Zawar Knar)	IHK-0052	30.4346	67.188	TKs	7.96667	2.43333	21.7333	3.7	50.4	75.8333	35.0333	13.3	0	0.2
Kach (Zawar Knar)	IHK-0053	30.4334	67.1882	TKs	4.63333	4.86667	16.4	6.6	50.8667	73.8667	31.6667	15.2667	0	1.2
			Average		6.1619	9.50952	16.3905	4.29524	46.319	67.0048	32.9048	16.5143	0.0571429	0.6
Kalata GIDAR DHOR FORMATION (Tgd)
Johan (Splangi)	IHK-0030	29.4623	66.9472	Tgd	1.5	5.96667	61.5333	3.73333	6.63333	71.9	81.9333	20.4	0	0
Johan (Phad Maran)	IHK-0010	29.3439	66.7197	Tgd		85.3333		14.2	0.4	14.6	0	0	0	0
Surab (microwave station)	IHK-0019	28.4158	66.3126	Tgd	0.433333	0.4	77	3.3	6.2	86.5	89.1667	12.1667	0	0
			Average		0.644444	30.5667	46.1778	7.07778	4.41111	57.6667	57.0333	10.8556	0	0
Key
Tgu = Upper Ghazij Formation
Tgm = Middle Ghazij Formation
Tgl = Lower Ghazij Formation
Tks = Kach Sequence
Tgd = Gidar Dhor Formation
PIZ = Pir Ismail Ziarat
Lst = Limestone
